# Supplementary material for: Hydrodehalogenation of organohalides by Et3SiH catalysed by group 4 metal complexes and B(C6F5)3
Source: Royal Society of Chemistry journal article supplement (doi:10.1039/d0dt00360c), 2020-01-01
Supplement: d0dt00360c1.pdf [file d0dt00360c1.pdf]

## **Supplementary Information**

### Hydrodehalogenation of organohalides by Et<sub>3</sub>SiH catalysed by group 4 metal complexes and B(C<sub>6</sub>F<sub>5</sub>)<sub>3</sub>

David Dunlop, Jiří Pinkas, Michal Horáček, Naděžda Žilková, and Martin Lamač\*

*J. Heyrovský Institute of Physical Chemistry, The Czech Academy of Sciences, v.v.i., Dolejškova 2155/3, 18223 Prague 8, Czech Republic*

#### Contents:

|                                                                                                                                                                          |    |
|--------------------------------------------------------------------------------------------------------------------------------------------------------------------------|----|
| 1. Experimental section                                                                                                                                                  | S2 |
| 1.1 General experimental details                                                                                                                                         | S2 |
| 1.2 Catalytic HDF reaction – typical procedure                                                                                                                           | S2 |
| 1.3 NMR observation of the reaction kinetics                                                                                                                             | S4 |
| 1.4 Solvent dehalogenation – identification of products                                                                                                                  | S4 |
| 1.5 Determination of Friedel-Crafts side-products of HDF reaction                                                                                                        | S4 |
| 1.6 HDF of PhCF <sub>3</sub> catalysed by TiCl <sub>4</sub> without borane                                                                                               | S5 |
| 1.7 Attempted HDF reaction catalysed by Cp <sub>2</sub> TiMe <sub>2</sub> /Ph <sub>3</sub> C <sup>+</sup> [B(C <sub>6</sub> F <sub>5</sub> ) <sub>4</sub> ] <sup>-</sup> | S5 |
| 2. References                                                                                                                                                            | S6 |

## **1. Experimental section**

### **1.1 General experimental details**

All reactions and manipulations with air- and moisture-sensitive compounds were carried out under an argon atmosphere using standard Schlenk techniques or in a glovebox Labmaster 130 (mBraun) under purified nitrogen. All solvents (typically HPLC grade HiPerSolv Chromanorm, VWR Prolabo Chemicals) were appropriately dried: THF, toluene, *n*-hexane, dichloromethane, and chloroform were purified by a solvent purification system (PureSolv MD 7; Innovative Technology, Inc.). Water content was periodically monitored by Karl–Fisher titration to be within the range 1–3 ppm. 1,2-Dichloroethane, chlorobenzene, fluorobenzene, trifluorotoluene, and triethylsilane were refluxed with CaH<sub>2</sub>, then distilled under argon and stored over 4Å molecular sieves. 4-(trifluoromethyl)anisole, 1-fluoro-4-(trifluoromethyl)benzene, and perfluorotoluene were degassed and stored over 4Å molecular sieves. Deuterated solvents were dried as follows: benzene-*d*<sub>6</sub>, toluene-*d*<sub>8</sub> were refluxed with Na/benzophenone ketyl, distilled under argon, and stored over 4Å molecular sieves; chloroform-*d*, bromobenzene-*d*<sub>5</sub> were refluxed with CaH<sub>2</sub>, then distilled under argon and stored over 4Å molecular sieves. The precatalysts Cp<sub>2</sub>MCl<sub>2</sub> (M = Ti, Zr, Hf), CpTiCl<sub>3</sub>, TiCl<sub>4</sub>, Cp\*<sub>2</sub>TiCl<sub>2</sub>, Cp<sub>2</sub>TiMe<sub>2</sub> (as a 5 wt. % solution in toluene), and B(C<sub>6</sub>F<sub>5</sub>)<sub>3</sub> were purchased from Strem Chemicals, M-Cat, or Sigma Aldrich and were used as received. Cp<sub>2</sub>TiF<sub>2</sub> [1] and Cp\*<sub>2</sub>TiF<sub>2</sub> [2] were prepared by literature methods and were purified by recrystallization or sublimation.

<sup>1</sup>H (300.0 MHz) and <sup>19</sup>F (282.2 MHz) NMR spectra were recorded on a Varian Unity 300 spectrometer at 293 K. Chemical shifts (δ/ppm) are given relative to solvent signals (benzene-*d*<sub>6</sub>: δ<sub>H</sub> 7.16; C<sub>6</sub>D<sub>5</sub>Br: δ<sub>H</sub> 7.30, CDCl<sub>3</sub>: δ<sub>H</sub> 7.26), <sup>19</sup>F NMR spectra were referenced to the PhCF<sub>3</sub> signal at –63.72 ppm (external reference was alternatively used).

GC-MS analyses were performed with a Thermo Focus DSQ instrument using a capillary column Thermo TR-5MS (15 m, ID 0.25 mm). GC-FID measurements were performed on an Agilent 6890 with a DB-5 column (length: 50 m, ID 0.32 mm, stationary phase thickness: 1 μm) with *n*-decane as an internal standard.

### **1.2 Catalytic HDF reaction – typical procedure**

The solid metal pre-catalyst (5 mol%) and B(C<sub>6</sub>F<sub>5</sub>)<sub>3</sub> (5 mol%) were placed in a Schlenk tube under argon atmosphere and dissolved in the selected solvent. PhCF<sub>3</sub> (100 μL, 0.81 mmol) and then Et<sub>3</sub>SiH (0.52 mL, 4.0 equiv) were added to the solution (addition of the silane typically induced a colour change to deep green-brown and sometimes led to a slight heat evolution). The total volume of the reaction mixture was set to 3 mL. The reaction was stirred for 20 h at room temperature (22 °C), then exposed to air and after the addition of appropriate internal standard (*n*-decane, mesitylene, or hexafluorobenzene) aliquots were immediately analysed by <sup>1</sup>H, <sup>19</sup>F NMR (see representative figures S1-S3) after dilution with an appropriate deuterated solvent (typically CDCl<sub>3</sub>), and other portions were filtered through a short pad of silicagel and analysed by GC, and/or GC-MS.

Alternatively, the catalyst solution (such as TiCl<sub>4</sub> in CHCl<sub>3</sub>) was added as the last component to the mixture of the substrate PhCF<sub>3</sub>, Et<sub>3</sub>SiH, and B(C<sub>6</sub>F<sub>5</sub>)<sub>3</sub> in the same solvent to initiate the reaction. This procedure was tested also for the Cp<sub>2</sub>TiCl<sub>2</sub>-catalysed reaction and gave the same results as the above described procedure.

<sup>1</sup>H NMR revealed the conversion of Et<sub>3</sub>SiH to Et<sub>3</sub>SiF (and/or Et<sub>3</sub>SiCl in the presence of aliphatic chlorinated solvents such as CHCl<sub>3</sub>) – see Fig. S1. In case on successful HDF reaction, <sup>19</sup>F NMR signal for Et<sub>3</sub>SiF (δ<sub>F</sub> –176.7 ppm) [3] appeared as the only fluorine-containing product (see Fig. S2) and its amount corresponded to the converted C-F bonds, i.e. the sum of the C-F bonds in PhCF<sub>3</sub> and Si-F bonds in Et<sub>3</sub>SiF corresponded to the starting amount of the substrate as evaluated by comparison with an internal standard hexafluorobenzene.

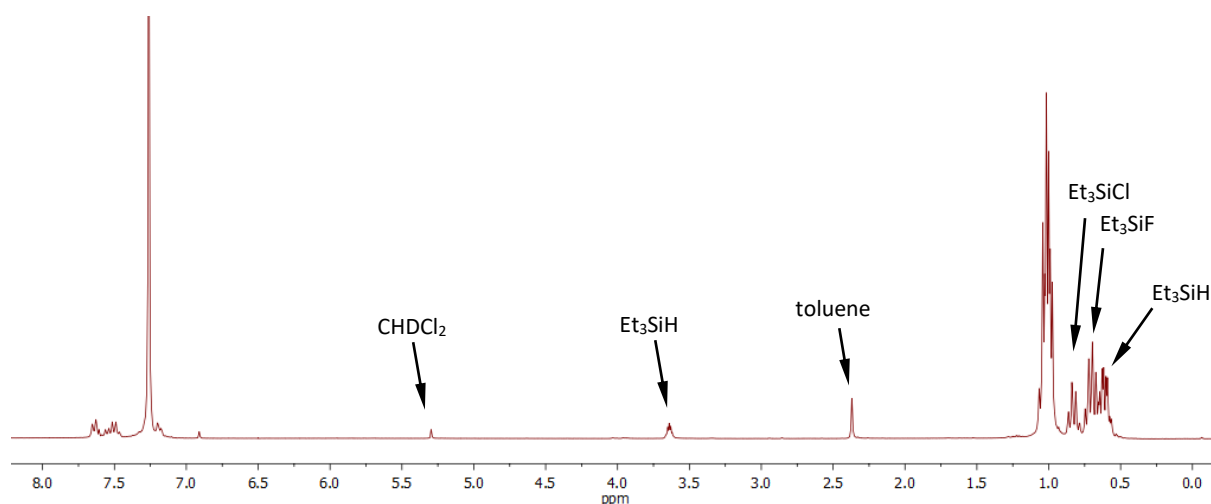

**Fig. S1**  $^1\text{H}$  NMR spectrum of the HDF reaction of  $\text{PhCF}_3$  with 4 equiv  $\text{Et}_3\text{SiH}$  catalysed by  $\text{Cp}_2\text{TiCl}_2$  and  $\text{B}(\text{C}_6\text{F}_5)_3$  performed in  $\text{CHCl}_3$  20 h at room temperature.

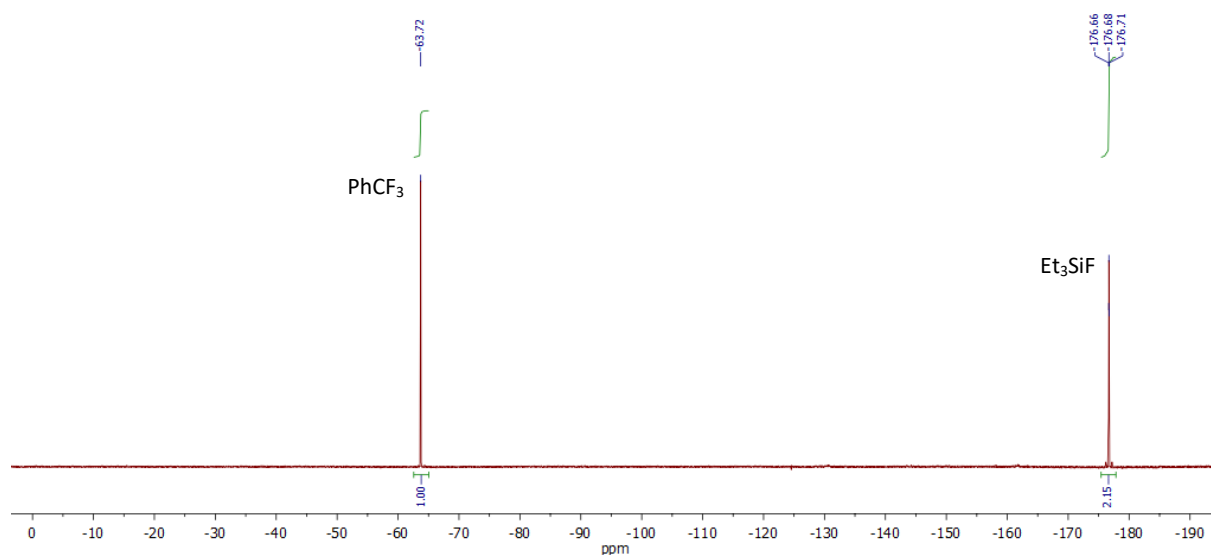

**Fig. S2**  $^{19}\text{F}$  NMR spectrum of the HDF reaction of  $\text{PhCF}_3$  with 4 equiv  $\text{Et}_3\text{SiH}$  catalysed by  $\text{Cp}_2\text{TiCl}_2$  and  $\text{B}(\text{C}_6\text{F}_5)_3$  performed in  $\text{CHCl}_3$  20 h at room temperature. C-F conversion determined: 68%.

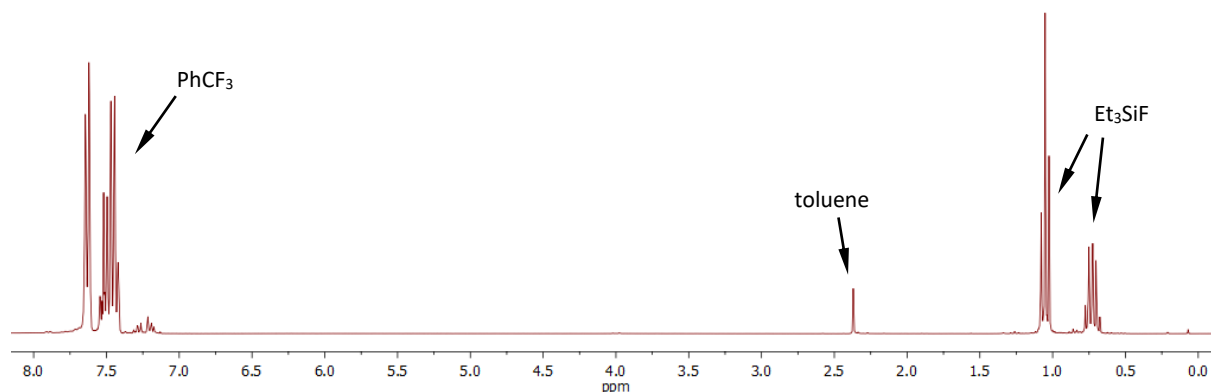

**Fig. S3**  $^1\text{H}$  NMR spectrum of the HDF reaction of neat  $\text{PhCF}_3$  with  $\text{Et}_3\text{SiH}$  catalysed by  $\text{Cp}_2\text{TiCl}_2$  and  $\text{B}(\text{C}_6\text{F}_5)_3$  after 20 h at room temperature. Only  $\text{Et}_3\text{SiF}$ , toluene, and excess  $\text{PhCF}_3$  can be observed.

### 1.3 NMR observation of the reaction kinetics

The reaction mixtures were prepared in a Schlenk vessel as described above using half amount of the reagents and  $\text{CDCl}_3$  as the solvent. The mixtures were immediately transferred to a NMR tube cooled in liquid nitrogen. The mixture was briefly degassed and the tube flame-sealed under vacuum. NMR spectra were then taken in regular time intervals to determine the conversion of  $\text{PhCF}_3$  (see Fig. 2 in the main article).

In the case of  $\text{Cp}^*\text{TiF}_2$  catalyst,  $\text{Et}_3\text{SiH}$  (4 equiv.) was consumed after ca 5 h by a concurrent reaction with  $\text{CDCl}_3$  and the conversion of  $\text{PhCF}_3$  stopped. After opening the tube, additional  $\text{Et}_3\text{SiH}$  (4 equiv.) was added and the reaction was further monitored by NMR. The reaction proceeded at a slightly lower rate (possibly due to some catalyst decomposition), but reached 60%  $\text{PhCF}_3$  conversion after 20 h, showing that the catalyst was still active.

### 1.4 Solvent dehalogenation – identification of products

Notably, a product of hydrodechlorination of  $\text{CDCl}_3$ ,  $\text{CH}_3\text{D}$  (1:1:1 triplet at  $\delta$  0.22 ppm, see Fig. S4), was observed in a sealed NMR tube containing a  $\text{CDCl}_3$  solution of catalytic HDF reaction as described above. The reaction scheme for HDCl of chloroform is depicted below (Scheme S1). The reactivity of dichloromethane or 1,2-dichloroethane is analogous.

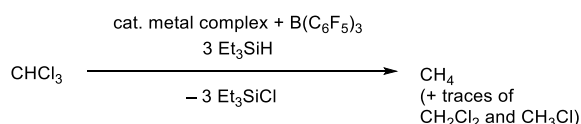

**Scheme S1** Hydrodechlorination (HDCl) of chloroform by  $\text{Et}_3\text{SiH}$  catalysed by group 4 metal complex and  $\text{B}(\text{C}_6\text{F}_5)_3$ .

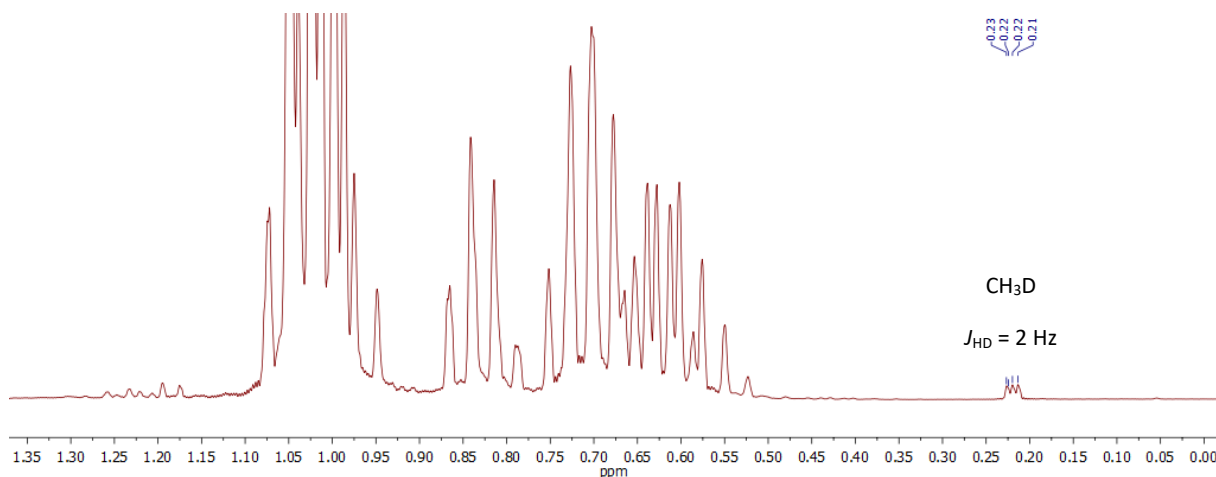

**Fig. S4**  $^1\text{H}$  NMR spectrum of the HDF reaction of  $\text{PhCF}_3$  with  $\text{Et}_3\text{SiH}$  catalysed by  $\text{Cp}^*\text{TiF}_2$  and  $\text{B}(\text{C}_6\text{F}_5)_3$  after 2 h at room temperature.

### 1.5 Determination of Friedel-Crafts side-products of HDF reaction

The selectivity of catalytic HDF reactions was analysed by the determination of toluene yield in the product mixture by GC (or NMR – integration of the toluene signal against mesitylene internal standard gave results comparable to GC analysis). Friedel-Crafts products were identified in the reaction mixtures, especially in the presence of stronger Lewis acids such as  $\text{TiCl}_4$ . Suggested mechanism of formation is depicted in Scheme S2.

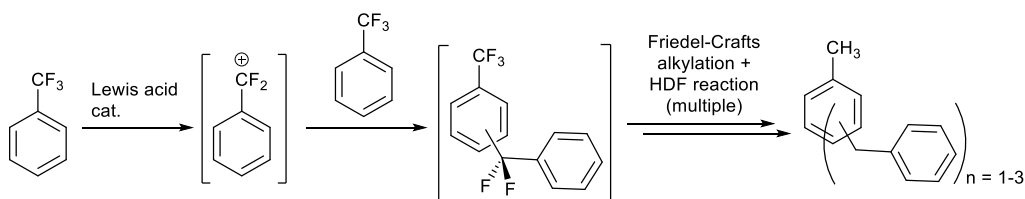

**Scheme S2** Suggested mechanism of formation of Friedel-Crafts by-products during HDF of  $\text{PhCF}_3$ . Identity of selected Friedel-Crafts by-products was elucidated from GC-MS (Fig. S5).

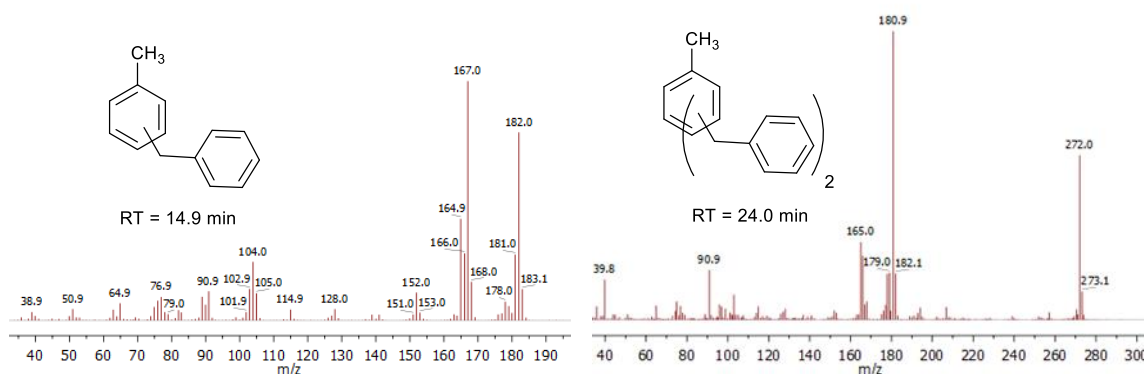

**Fig. S5** Mass spectra of benzylated toluenes obtained from the HDF reaction of  $\text{PhCF}_3$  with  $\text{Et}_3\text{SiH}$  catalysed by  $\text{TiCl}_4$  and  $\text{B}(\text{C}_6\text{F}_5)_3$  in  $\text{CHCl}_3$ .

### 1.6 HDF of $\text{PhCF}_3$ catalysed by $\text{TiCl}_4$ without borane

We attempted to reproduce the reaction conditions reported for HDF by Yamada et al.,<sup>[4]</sup> who used only  $\text{TiCl}_4$  as the catalyst. In our hands, however, reactions in the presence of up to 30 mol% of  $\text{TiCl}_4$  did not proceed at all, unlike those, where  $\text{B}(\text{C}_6\text{F}_5)_3$  was employed (see Table 1, entry 6 in the main article). It is important to note, that the reactions were performed under strictly anaerobic and moisture-free conditions. As soon as such a reaction mixture was exposed to air, the catalytic process was initiated and complete conversion of  $\text{PhCF}_3$  was observed typically in the course of several hours. Notably, however, only traces of toluene were present in the final mixture, whereas the Friedel-Crafts products dominated (see Fig. S6).

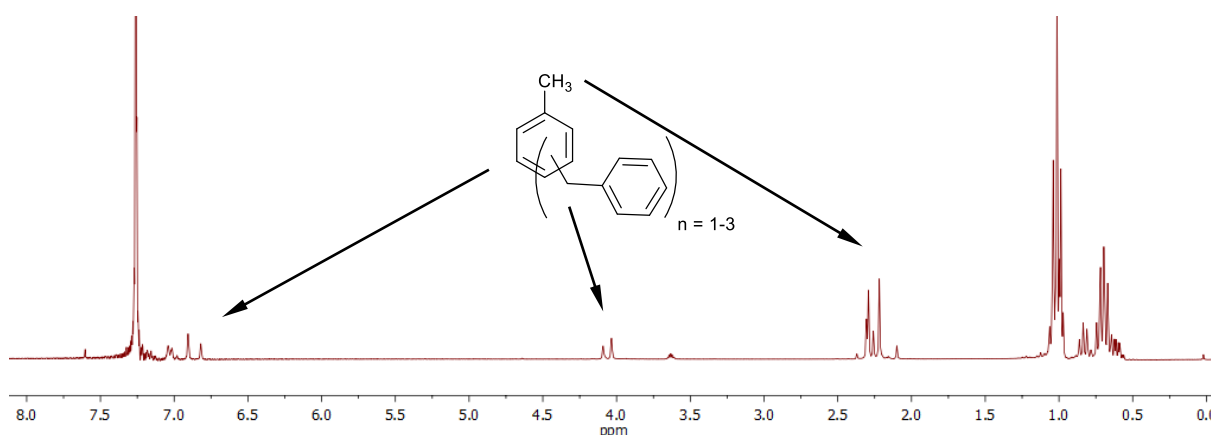

**Fig. S6**  $^1\text{H}$  NMR spectrum of the HDF reaction of  $\text{PhCF}_3$  with  $\text{Et}_3\text{SiH}$  catalysed by 30 mol%  $\text{TiCl}_4$  in  $\text{CHCl}_3$  under air. Friedel-Crafts products of sequential self-alkylation/HDF of  $\text{PhCF}_3$  are highlighted.

### 1.7 Attempted HDF reaction catalysed by $\text{Cp}_2\text{TiMe}_2/\text{Ph}_3\text{C}^+[\text{B}(\text{C}_6\text{F}_5)_4]^-$

This experiment should reveal the role of  $\text{B}(\text{C}_6\text{F}_5)_3$  and the  $[\text{HB}(\text{C}_6\text{F}_5)_3]^-$  anion in the catalysis. A solution of  $\text{Cp}_2\text{TiMe}_2$  (amount corresponding to 5 mol% vs. the substrate – i.e., 0.041 mmol Ti) in  $\text{PhCl}$  was

added to the solid  $\text{Ph}_3\text{C}^+[\text{B}(\text{C}_6\text{F}_5)_4]^-$  (0.6 equiv vs Ti – substoichiometric amount to exclude formation of  $\text{Et}_3\text{Si}^+$  cation by the reaction of  $\text{Et}_3\text{SiH}$  with  $\text{Ph}_3\text{C}^+$ ), which dissolved to form a yellow-brown solution. Methyl abstraction from  $\text{Cp}_2\text{TiMe}_2$  to form a cationic species by this method was studied by Baid et al. [5] After 5 min stirring at room temperature,  $\text{PhCF}_3$  (100  $\mu\text{L}$ , 0.81 mmol) and then  $\text{Et}_3\text{SiH}$  (0.52 mL, 4.0 equiv) were added. The colour of the mixture changed to amber-green, stirring at room temperature was continued for 20 h and the resulting mixture was analysed. Virtually no conversion of  $\text{PhCF}_3$  was observed. When the experiment was repeated using stoichiometric amount of  $\text{Ph}_3\text{C}^+[\text{B}(\text{C}_6\text{F}_5)_4]^-$  vs Ti, complete conversion of  $\text{PhCF}_3$  was achieved, the mixture contained predominantly Friedel-Crafts products and only traces of toluene. In a control experiment,  $\text{Cp}_2\text{TiMe}_2$  was used in a catalytic amount without any additional activator (borane or borate), which exhibited no catalytic activity. In yet another control experiment, conditions reported by Ozerov et al. were applied [6], using only catalytic amount of  $\text{Ph}_3\text{C}^+[\text{B}(\text{C}_6\text{F}_5)_4]^-$ , which gave complete  $\text{PhCF}_3$  conversion forming predominantly Friedel-Crafts products. This suggested that the formation of  $\text{Et}_3\text{Si}^+$  cation, even in small amounts, may have been responsible for the catalytic activity. When the silylium-catalysed route is excluded (with substoichiometric amount of  $\text{Ph}_3\text{C}^+$ ), the role of  $\text{B}(\text{C}_6\text{F}_5)_3$  as the hydride transfer agent in the metal-based catalysis is crucial and in its absence the system is inactive.

## **2. References**

- [1] G. M. Laughlin, Process for producing fluorinated catalysts; US20040043893A1.
- [2] Y. Mugnier, C. Moise, and E. Laviron, *J. Organomet. Chem.* 1981, **204**, 61.
- [3] V. Varga, M. Lamač, M. Horáček, R. Gyepes and J. Pinkas, *Dalton Trans.*, 2016, **45**, 10146.
- [4] T. Yamada, K. Saito and T. Akiyama, *Adv. Synth. Catal.*, 2016, **358**, 62.
- [5] F. Sauriol, J. F. Sonnenberg, S. J. Chadder, A. F. Dunlop-Brière, M. C. Baird and P. H. M. Budzelaar, *J. Am. Chem. Soc.*, 2010, **132**, 13357.
- [6] V. J. Scott, R. Çelenligil-Çetin and O. V. Ozerov, *J. Am. Chem. Soc.*, 2005, **127**, 2852.
